# Supplementary material for: Magnetically Activated Piezoelectric 3D Platform Based on Poly(Vinylidene) Fluoride Microspheres for Osteogenic Differentiation of Mesenchymal Stem Cells
Source: MDPI journal article supplement (doi:10.3390/gels8100680), 2022-10-20
Supplement: s1 [file s1]

## *Supplementary Materials for:*

# **Magnetically Activated Piezoelectric 3D Platform Based on Poly(Vinylidene) Fluoride Microspheres for Osteogenic Differentiation of Mesenchymal Stem Cells**

**Maria Guillot-Ferriols <sup>1,2,\*</sup>, María Inmaculada García-Briega <sup>1,2</sup>, Laia Tolosa <sup>2,3</sup>, Carlos M. Costa <sup>4,5,6</sup>, Senentxu Lanceros-Méndez <sup>4,5,7,8</sup>, José Luis Gómez Ribelles <sup>1,2</sup>, Gloria Gallego Ferrer <sup>1,2</sup>**

<sup>1</sup> Centre for Biomaterials and Tissue Engineering (CBIT), Universitat Politècnica de València, 46022 Valencia, Spain

<sup>2</sup> Biomedical Research Networking Center on Bioengineering, Biomaterials and Nanomedicine, Carlos III Health Institute (CIBER-BBN, ISCIII), 46022 Valencia, Spain

<sup>3</sup> Experimental Hepatology Unit, Health Research Institute La Fe (IIS La Fe), 46026 Valencia, Spain

<sup>4</sup> Physics Centre of Minho and Porto Universities (CF-UM-UP), University of Minho, 4710-057 Braga, Portugal

<sup>5</sup> Laboratory of Physics for Materials and Emergent Technologies, LapMET, University of Minho, 4710-057 Braga, Portugal

<sup>6</sup> Institute of Science and Innovation for Bio-Sustainability (IB-S), University of Minho, 4710-057 Braga, Portugal

<sup>7</sup> BCMaterials, Basque Center for Materials, Applications and Nanostructures, UPV/EHU Science Park, 48940 Leioa, Spain

<sup>8</sup> IKERBASQUE, Basque Foundation for Science, 48009 Bilbao, Spain.

\* Correspondence: maguifer@upv.es (M.G.-F.)

**Table S1.** Primer sequences used for Real-time qPCR. Alkaline phosphatase (ALP), Collagen type I (COL I), Runt-related transcription factor 2 (RUNX2), Osteocalcin (OCN), glyceraldehyde-3-phosphate dehydrogenase (GAPDH).

| Gene  | Forward Primer (5'-3') | Reverse Primer (5'-3') | Annealing Temperature (°C) |
|-------|------------------------|------------------------|----------------------------|
| ALP   | ATGAAGGAAAAGCCAAGCAG   | CCACCAAATGTGAAGACGTG   | 55.2                       |
| COL I | GCCAAGACGAAGACATCCCA   | GGCAGTTCTTGGTCTCGTCA   | 59.5                       |
| RUNX2 | TCACAAATCCTCCCCAAGTA   | GGCGGTCAGAGAACAACAACTA | 55.7                       |
| OCN   | GTGCAGAGTCCAGCAAAGGT   | TCAGCCAACTCGTCACAGTC   | 59.2                       |
| GAPDH | GTCTCCTCTGACTTCAACAGCG | ACCACCCTGTTGCTGTAGCCAA | 62.4                       |

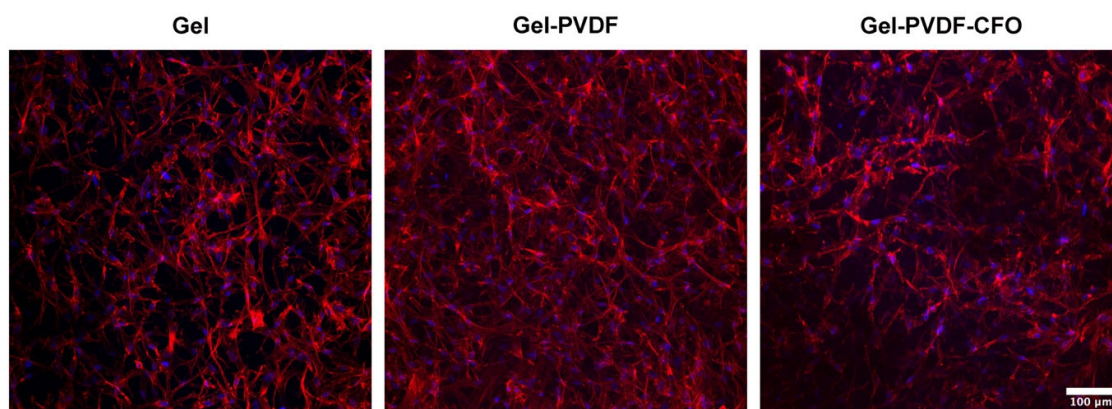

**Figure S1.** Representative Z projection of non-cryosectioned Gel, Gel-PVDF and Gel-PVDF-CFO hydrogels after 14 days in culture in static condition. Actin cytoskeleton appears in red and cell nuclei in blue. Scale bar 100  $\mu\text{m}$ .
